# Supplementary material for: Diiron dithiolate complexes containing intra-ligand NH⋯S hydrogen bonds: [FeFe] hydrogenase active site models for the electrochemical proton reduction of HOAc with low overpotential
Source: Royal Society of Chemistry journal article supplement (doi:10.1039/b715990k), 2008-01-01
Supplement: b715990k.pdf [file b715990k.pdf]

## Diiron dithiolate complexes containing intra-ligand NH...S hydrogen bonds: [FeFe] hydrogenase active site models for the electrochemical proton reduction of HOAc with low overpotential

Ze Yu,<sup>a</sup> Mei Wang,<sup>\*a</sup> Ping Li,<sup>a</sup> Weibing Dong,<sup>a</sup> Fujun Wang,<sup>a</sup> and Licheng Sun<sup>\*a,b</sup>

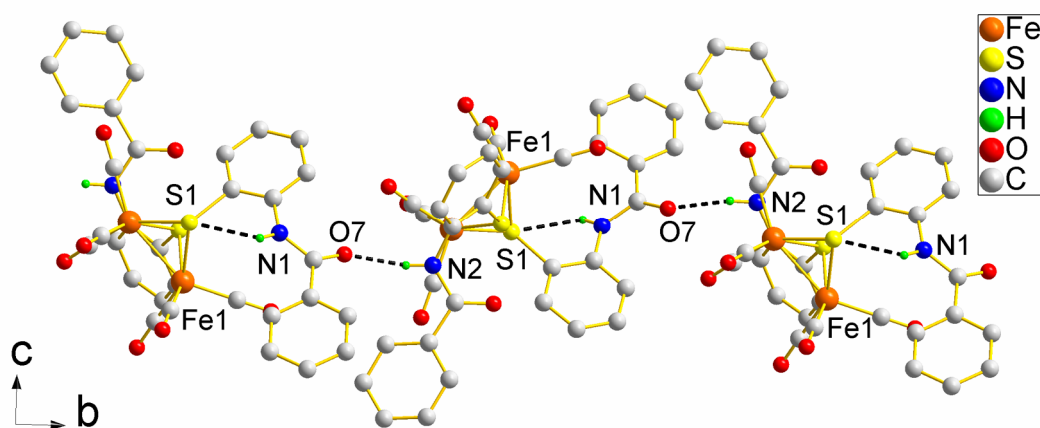

Fig. S1 The N(1)H...S(1) and N(2)H...O(7) hydrogen bonds in complex 3.

<sup>a</sup> State Key Laboratory of Fine Chemicals, DUT-KTH Joint Education and Research Center on Molecular Devices, Dalian University of Technology (DUT), Dalian 116012 China. E-mail: symbueno@dlut.edu.cn; Fax: +86-411-83702185; Tel: +86-411-88993886

<sup>b</sup> Department of Chemistry, Royal Institute of Technology (KTH), 10044, Stockholm, Sweden

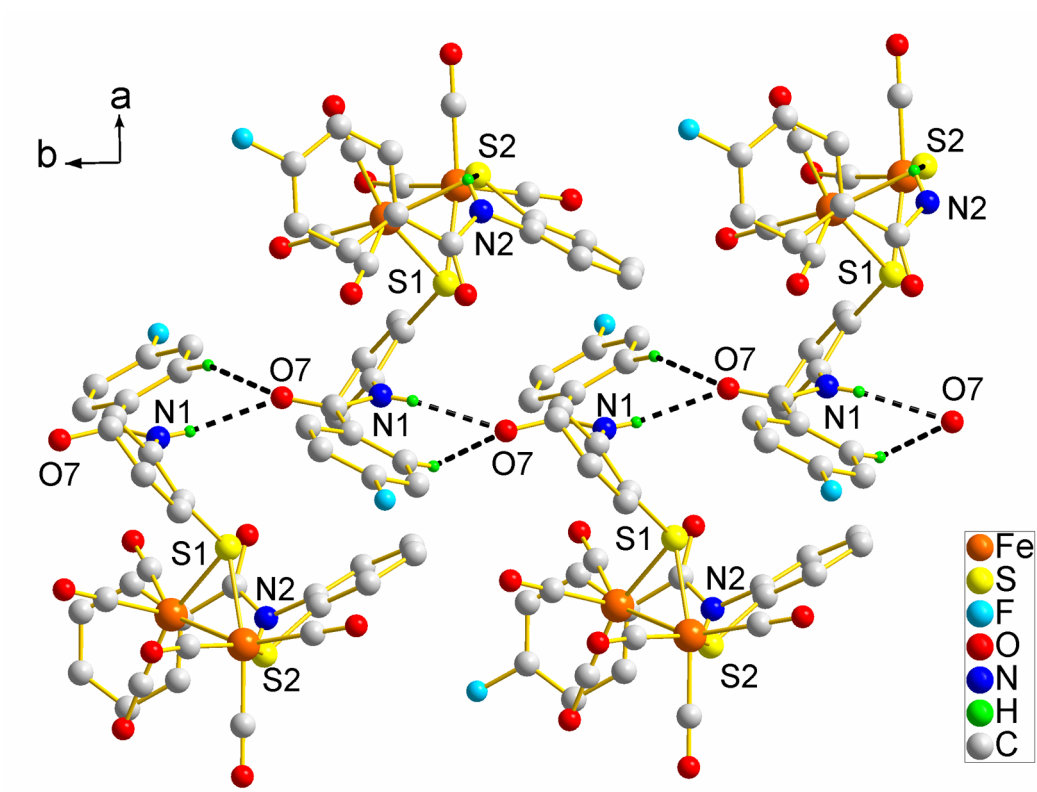

**Fig. S2** The N(1)H...O(7) and *ortho*-H...O(7) hydrogen bonds in complex 4.

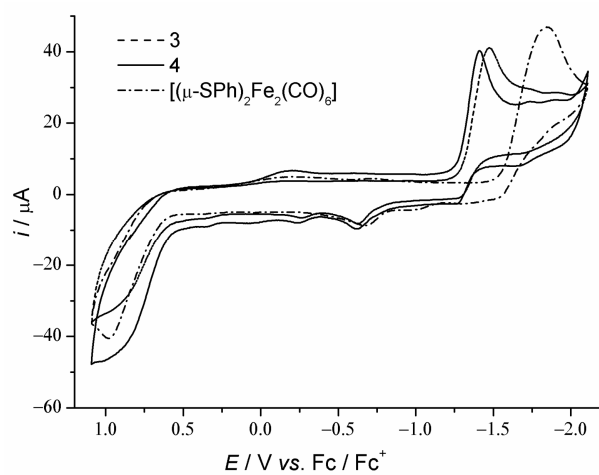

**Fig. S3** Cyclic voltammograms of **3**, **4** and  $[(\mu\text{-SPh})_2\text{Fe}_2(\text{CO})_6]$  (1.0 mM) in  $\text{CH}_2\text{Cl}_2$  with 0.05 M  $n\text{Bu}_4\text{NPF}_6$  at a scan rate of  $100 \text{ mV s}^{-1}$ .

**Table S1** The NH...S data for complex 3.

| Donor | --- H.... | Acceptor | [ ARU ]     | D - H | H...A | D...A  | D - H...A |
|-------|-----------|----------|-------------|-------|-------|--------|-----------|
| N(1)  | --H(1)    | ..S(1)   | [ ]         | 0.86  | 2.63  | 2.9389 | 102       |
| N(1)  | --H(1)    | ..O(15)  | [ ]         | 0.86  | 2.06  | 2.8580 | 155       |
| N(2)  | --H(2)    | ..O(7)   | [ 2655.01 ] | 0.85  | 2.04  | 2.8729 | 168       |
| N(3)  | --H(3)    | ..O(8)   | [ 1455.01 ] | 0.85  | 2.21  | 2.8807 | 135       |
| N(4)  | --H(4)    | ..S(4)   | [ ]         | 0.91  | 2.63  | 2.9263 | 100       |
| C(11) | --H(11A)  | ..O(7)   | [ ]         | 0.93  | 2.43  | 2.8794 | 110       |
| C(28) | --H(28A)  | ..O(7)   | [ 2655.01 ] | 0.93  | 2.59  | 3.2820 | 132       |
| C(47) | --H(47A)  | ..O(15)  | [ ]         | 0.93  | 2.49  | 2.8001 | 100       |
| C(54) | --H(54A)  | ..O(3)   | [ 2645.01 ] | 0.93  | 2.59  | 3.2008 | 123       |
| C(56) | --H(56A)  | ..O(16)  | [ ]         | 0.93  | 2.55  | 2.9937 | 109       |

**Table S2** The NH...S data for complex 4.

| Donor | --- H.... | Acceptor | [ ARU ]     | D - H | H...A | D...A  | D - H...A |
|-------|-----------|----------|-------------|-------|-------|--------|-----------|
| N(1)  | --H(1)    | ..O(7)   | [ 2655.01 ] | 0.86  | 2.11  | 2.8849 | 150       |
| N(2)  | --H(2)    | ..S(2)   | [ ]         | 0.86  | 2.62  | 2.9742 | 106       |
| C(19) | --H(19A)  | ..O(7)   | [ 2655.01 ] | 0.93  | 2.59  | 3.4618 | 157       |
